# Supplementary material for: Zaproszenie do medytacji o granicach przedsiębiorstwa
Source: Royal Society of Chemistry journal article supplement (doi:10.1039/c3dt50283j), 2000-01-01
Supplement: c3dt50283j.pdf [file c3dt50283j.pdf]

## Supplementary Information

### **Relative kinetic reactivity of boronic acid to boronate ion toward Tiron, 2,2-biphenol, and propyleneglycol**

**Eisuke Watanabe,<sup>a</sup> Chiaki Miyamoto,<sup>a</sup> Asumi Tanaka,<sup>a</sup> Kenzo Iizuka,<sup>a</sup> Satoshi Iwatsuki,<sup>b</sup> Masahiko Inamo,<sup>c</sup> Hideo D. Takagi,<sup>d</sup> and Koji Ishihara<sup>a,\*</sup>**

Figs S1 – S8

Tables S1 – S4

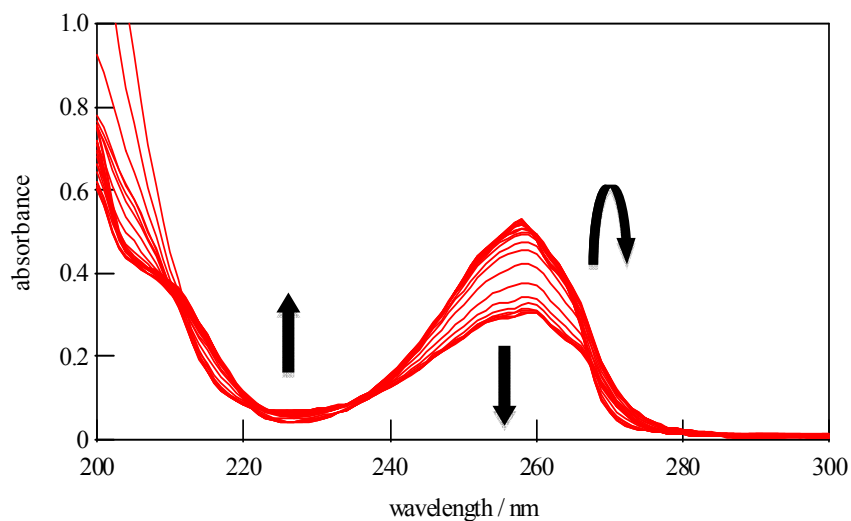

**Fig. S1** Change in UV-Vis spectra of 3-Pyridylboronic acid with pH in aqueous solution at 25 °C and  $I = 1.0$  M.  $C_B = 1.0 \times 10^{-4}$  M. pH 2.69–10.14

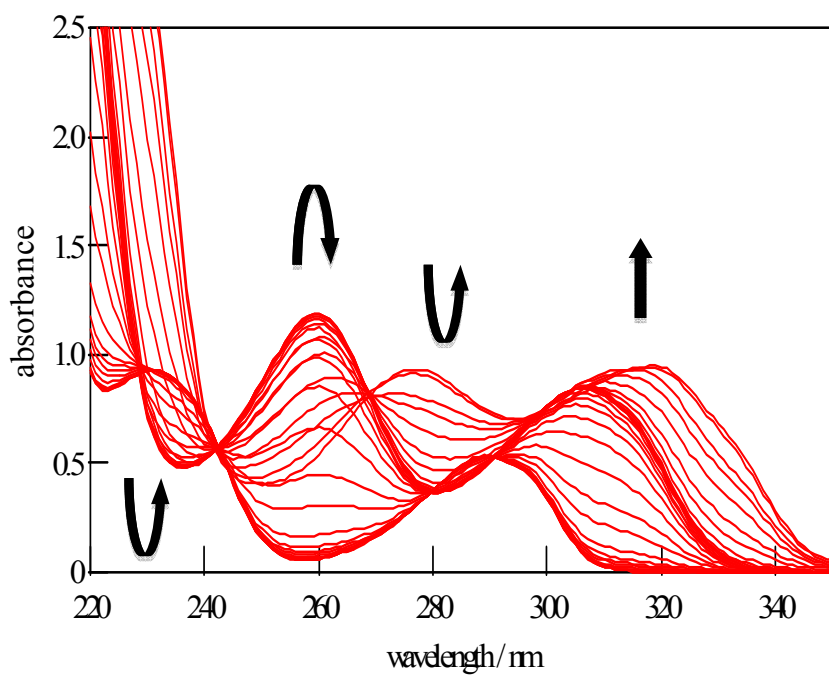

**Fig. S2** Change in UV-Vis spectra of Tiron with pH in aqueous solution at 25 °C and  $I = 1.0$  M.  $C_L = 1.47 \times 10^{-4}$  M. pH 2.25–12.42

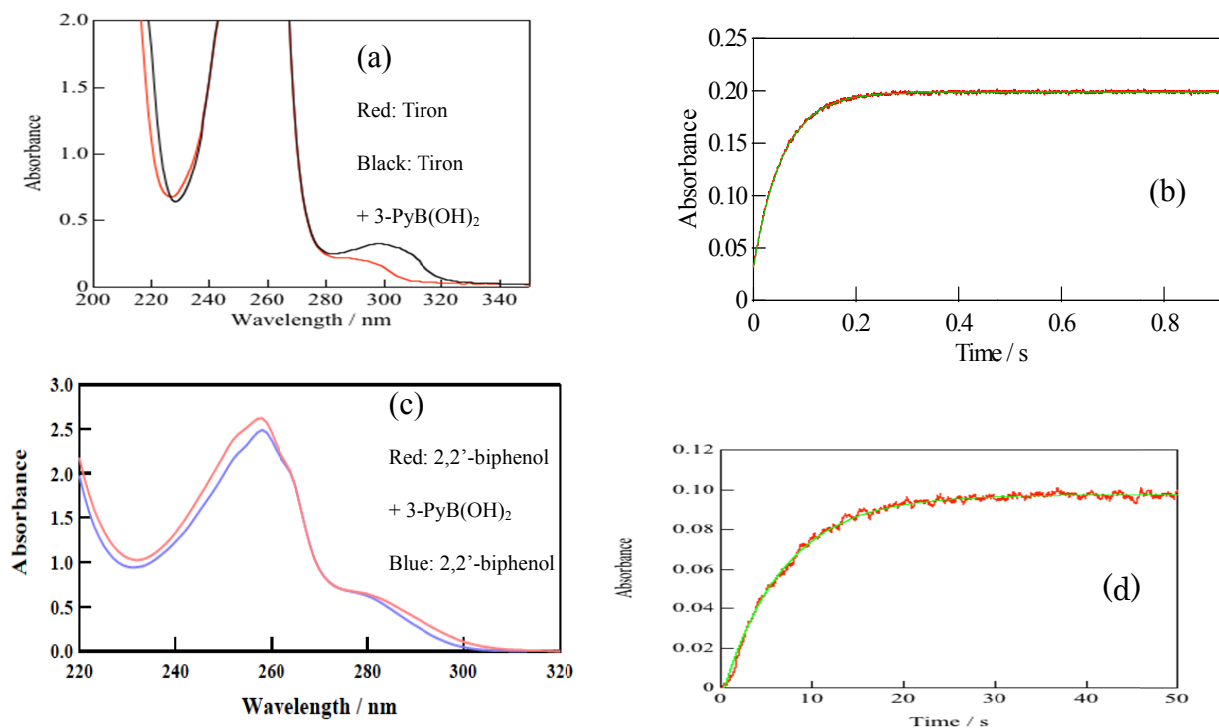

**Fig. S3** (a) Change in UV-Vis spectra of 3-PyB(OH)<sub>2</sub> with Tiron in acidic aqueous solution at 25 °C and  $I = 1.0$  M.  $C_B = 1.0 \times 10^{-3}$  M,  $C_L = 5.0 \times 10^{-5}$  M, and  $[H^+] = 1.0 \times 10^{-4}$  M; (b) time course measurements (at 309 nm) for the reaction of Tiron with 3-PyB(OH)<sub>2</sub> in acidic aqueous solution at 25.0 °C and  $I = 1.0$  M.  $C_B = 6.0 \times 10^{-4}$  M,  $C_L = 5.00 \times 10^{-5}$  M, and pH = 6.07; (c) Change in UV-Vis spectra of 3-PyB(OH)<sub>2</sub> with 2,2'-biphenol in acidic aqueous solution at 25 °C and  $I = 1.0$  M.  $C_B = 3.00 \times 10^{-3}$  M,  $C_L = 1.45 \times 10^{-4}$  M, and pH = 4.40; (d) time course measurements (at 294 nm) for the reaction of 2,2'-biphenol with 3-PyB(OH)<sub>2</sub> in acidic aqueous solution at 15.0 °C and  $I = 1.0$  M.  $C_B = 3.0 \times 10^{-3}$  M,  $C_L = 6.0 \times 10^{-5}$  M, and pH = 4.80.

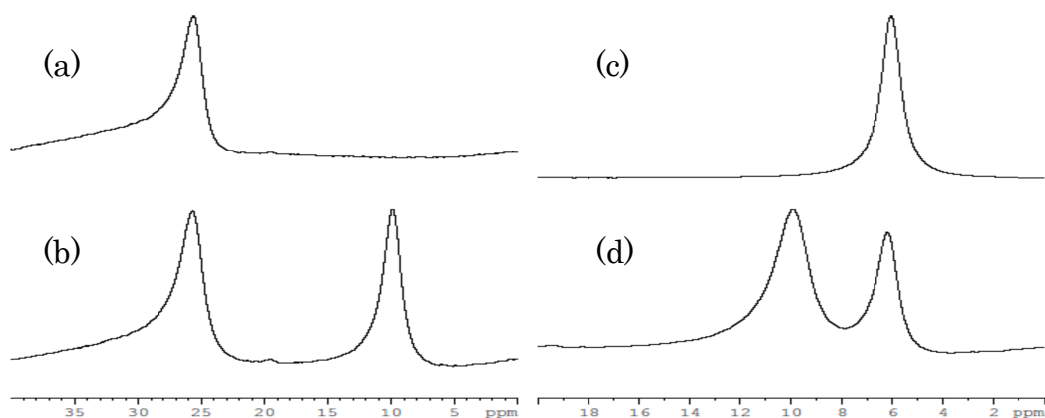

**Fig. S4**  $^{11}\text{B}$  NMR spectra of (a) 3-PyB(OH) $_2$  at pD = 2.6, (b) 3-PyB(OH) $_2$  + Tiron at pD = 2.6, (c) 3-PyB(OH) $_2$  at pD = 6.0, and (d) 3-PyB(OH) $_2$  + Tiron at pD = 6.0. (a)  $C_{\text{B}} = 7.1 \times 10^{-2}$  M; (b)  $C_{\text{B}} = 1.0 \times 10^{-2}$  M,  $C_{\text{L}} = 4.8 \times 10^{-2}$  M; (c)  $C_{\text{B}} = 6.9 \times 10^{-2}$  M; (d)  $C_{\text{B}} = 6.9 \times 10^{-2}$  M,  $C_{\text{L}} = 4.6 \times 10^{-2}$  M.

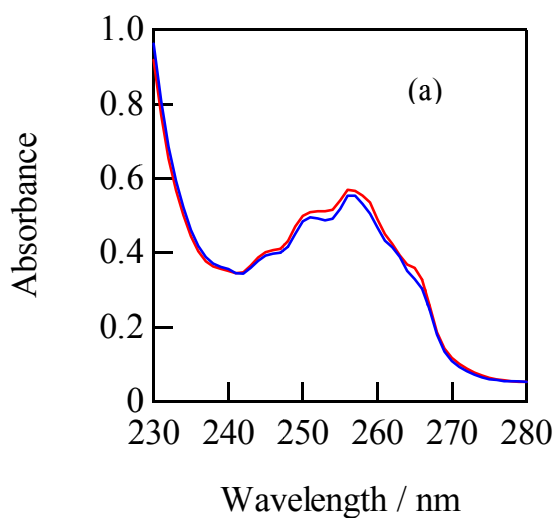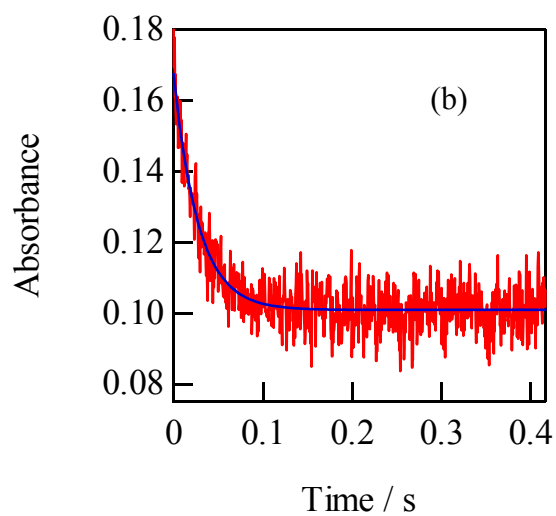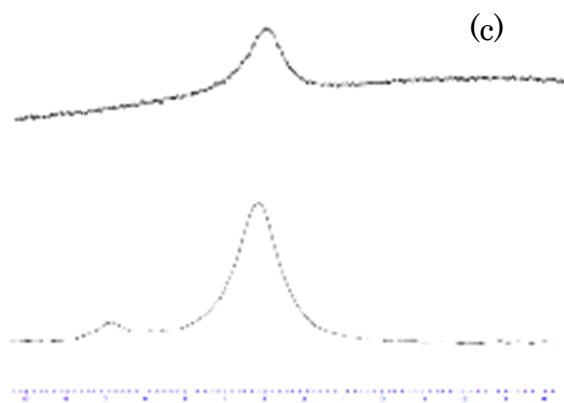

**Fig. S5** (a) UV-Vis spectra of PhB(OH)<sub>2</sub> (red) and the mixture of PhB(OH)<sub>2</sub> and propylene glycol (PG) (blue) at 25 °C and  $I = 0.10$  M; (b) change in absorbance with time for the reaction of PhB(OH)<sub>2</sub> with PG at 270 nm; (c) <sup>11</sup>B NMR spectra of PhB(OH)<sub>2</sub> (i) and the mixture of PhB(OH)<sub>2</sub> and PG (ii) in D<sub>2</sub>O. (a)  $C_B = 3.5 \times 10^{-3}$  M,  $C_L = 9.9 \times 10^{-1}$  M,  $C_{CAPS} = 0.10$  M, pH = 11.0; (b)  $C_B = 3.3$  mM,  $C_{PG} = 1.00$  M,  $C_{CAPS} = 0.10$  M, pH = 10.40; (c) (i)  $C_B = 1.0 \times 10^{-2}$  M, pD = 11.6, (ii)  $C_B = 1.0 \times 10^{-2}$  M,  $C_{PG} = 2.6 \times 10^{-2}$  M, pD = 11.6.

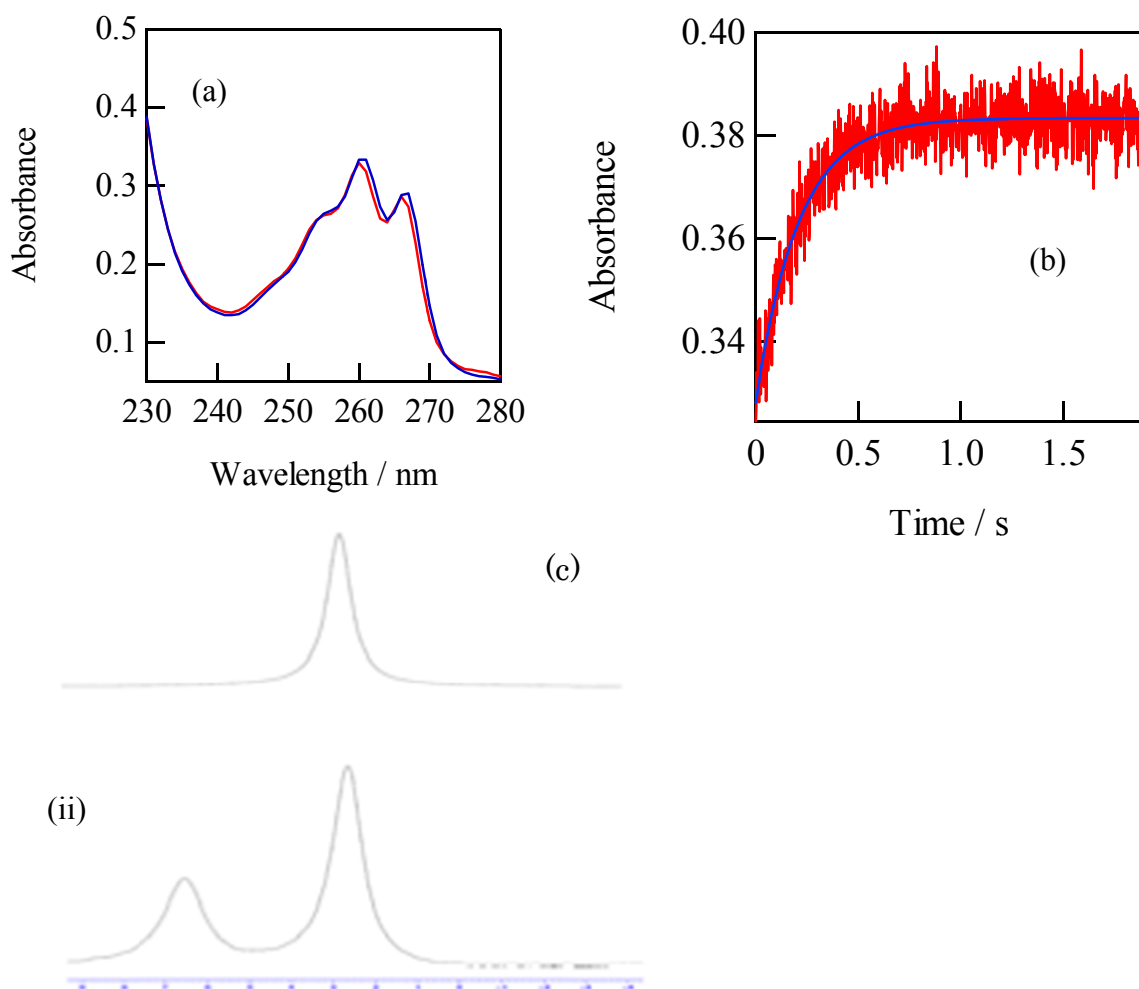

**Fig. S6** (a) UV-Vis spectra of 3-FPhB(OH)<sub>2</sub> (red) and the mixture of 3-FPhB(OH)<sub>2</sub> and propylene glycol (blue) at 25 °C and  $I = 0.10$  M; (b) change in absorbance with time for the reaction of 3-FPhB(OH)<sub>2</sub> with PG at 268 nm; (c) <sup>11</sup>B NMR spectra of 3-FPhB(OH)<sub>2</sub> (i) and the mixture of 3-FPhB(OH)<sub>2</sub> and PG (ii) in D<sub>2</sub>O. (a)  $C_B = 6.1 \times 10^{-4}$  M,  $C_L = 1.1$  M,  $C_{CAPS} = 0.10$  M, pH = 10.4; (b)  $C_B = 2.4$  mM,  $C_{PG} = 2.50 \times 10^{-1}$  M,  $C_{CAPS} = 0.10$  M, pH = 10.30; (c) (i)  $C_B = 3.4 \times 10^{-2}$  M, pD = 11.0, (ii)  $C_B = 1.7 \times 10^{-2}$  M,  $C_{PG} = 3.3 \times 10^{-1}$  M, pD = 11.0.

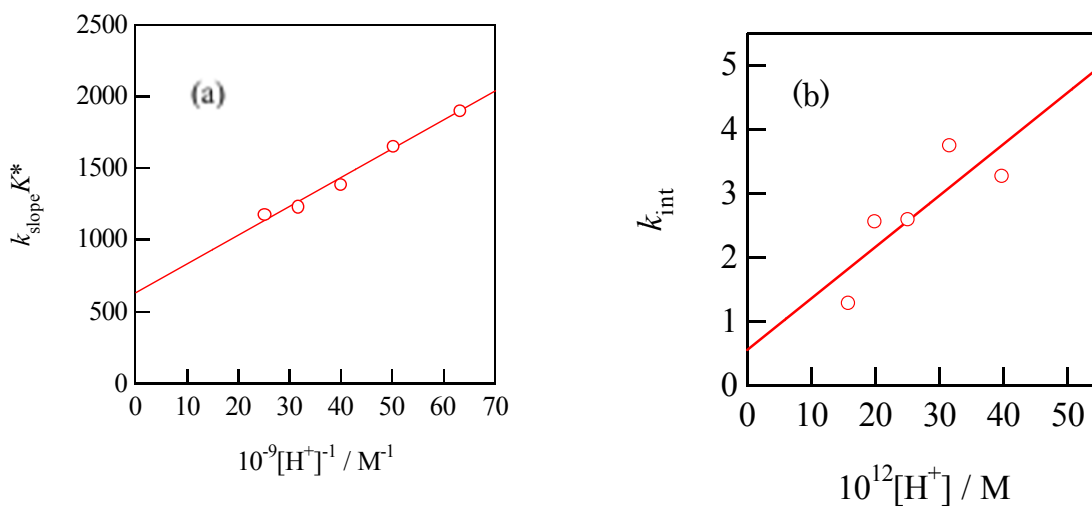

**Fig. S7** Dependence of (a)  $k_{\text{slope}}$  on  $[\text{H}^+]^{-1}$ , (b)  $k_{\text{int}}$  vs  $[\text{H}^+]$  for the reactions of  $\text{PhB}(\text{OH})_2$  with PG at 25 °C and  $I = 0.10 \text{ M}$ .

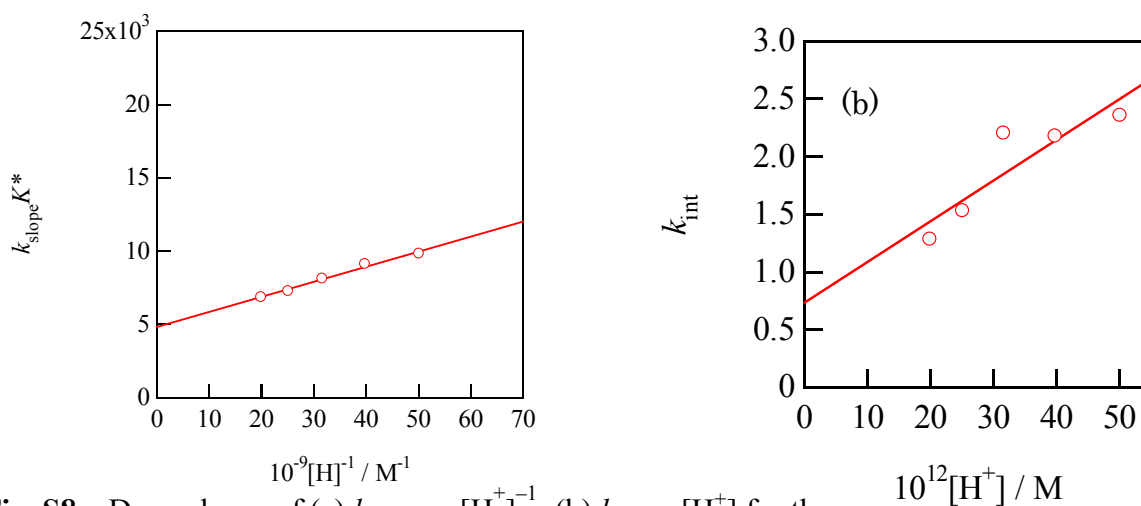

**Fig. S8** Dependence of (a)  $k_{\text{slope}}$  on  $[\text{H}^+]^{-1}$ , (b)  $k_{\text{int}}$  vs  $[\text{H}^+]$  for the reactions of 3-FPhB(OH)<sub>2</sub> with PG at 25 °C and  $I = 0.10 \text{ M}$ .

Table S1 Rate constants (25 °C,  $I = 0.10 \text{ M}$ ) for the reaction of phenylboronic acid with propyleneglycol in alkaline solution.  $C_B = 3.3 \times 10^{-3} \text{ M}$ , CAPS buffer (0.10 M) was used

| pH   | $C_B / M$ | $k_{obs}(\text{average})$ | $k_{obs} / s^{-1}$ |      |      |      |      |      |      |      |      |      |
|------|-----------|---------------------------|--------------------|------|------|------|------|------|------|------|------|------|
|      |           |                           | 9.85               | 9.08 | 8.62 | 9.24 | 9.27 | 9.28 | 9.09 | 9.19 | 10.1 | 9.91 |
| 10.4 | 0.25      | 9.49                      | 9.85               | 9.08 | 8.62 | 9.24 | 9.27 | 9.28 | 9.09 | 9.19 | 10.1 | 9.91 |
|      |           |                           | 10.6               | 9.60 | 9.53 |      |      |      |      |      |      |      |
|      | 0.5       | 15.0                      | 17.5               | 14.3 | 14.1 | 13.3 | 14.4 | 15.9 | 17.1 | 16.2 | 14.5 | 15.1 |
|      |           |                           | 13.7               | 15.4 | 13.7 |      |      |      |      |      |      |      |
|      | 0.75      | 21.3                      | 23.2               | 23.1 | 22.0 | 21.0 | 17.8 | 23.4 | 22.0 | 19.7 | 23.9 | 19.7 |
|      |           |                           | 21.6               | 18.5 | 22.1 | 19.6 |      |      |      |      |      |      |
|      | 1.00      | 27.5                      | 30.8               | 26.7 | 27.3 | 30.6 | 30.0 | 34.0 | 33.0 | 21.1 | 25.6 | 30.2 |
|      |           |                           | 23.1               | 26.6 | 25.6 | 25.7 | 22.3 |      |      |      |      |      |
| 10.5 | 0.25      | 8.91                      | 9.19               | 8.27 | 9.54 | 9.72 | 9.57 | 8.07 | 8.83 | 8.78 | 8.56 | 9.26 |
|      |           |                           | 8.69               | 8.86 | 8.90 | 9.55 | 7.97 | 8.85 |      |      |      |      |
|      | 0.5       | 13.9                      | 14.3               | 14.7 | 15.8 | 13.2 | 13.8 | 15.1 | 14.1 | 12.2 | 15.0 | 12.7 |
|      |           |                           | 15.7               | 13.3 | 13.9 | 14.5 | 12.1 | 12.3 | 12.6 | 14.8 |      |      |
|      | 0.751     | 18.2                      | 20.5               | 15.2 | 15.7 | 19.5 | 18.2 | 20.2 | 18.9 | 16.8 | 18.1 | 16.6 |
|      |           |                           | 19.1               | 19.5 | 18.6 | 18.5 | 19.0 | 17.1 |      |      |      |      |
|      | 1.00      | 24.2                      | 24.7               | 25.2 | 24.6 | 24.2 | 20.6 | 22.7 | 23.4 | 25.1 | 25.0 | 25.4 |
|      |           |                           | 26.6               | 23.1 |      |      |      |      |      |      |      |      |
| 10.6 | 0.25      | 7.08                      | 6.96               | 6.94 | 7.76 | 7.42 | 6.26 | 6.63 | 6.86 | 7.24 | 7.62 | 6.81 |
|      |           |                           | 7.53               | 6.71 | 7.31 | 7.26 | 7.19 | 6.59 | 7.43 | 6.97 |      |      |
|      | 0.499     | 11.7                      | 10.1               | 11.8 | 11.5 | 11.2 | 11.2 | 13.2 | 11.7 | 11.5 | 13.8 | 10.7 |
|      |           |                           | 12.7               | 10.9 | 11.6 | 11.4 | 12.3 |      |      |      |      |      |
|      | 0.75      | 15.9                      | 12.2               | 18.9 | 17.9 | 15.5 | 13.5 | 12.3 | 14.7 | 19.9 | 15.5 | 14.1 |
|      |           |                           | 17.9               | 15.6 | 16.8 | 18.0 | 15.7 | 17.5 | 14.8 | 16.6 | 15.5 |      |
|      | 1.00      | 20.7                      | 17.8               | 15.4 | 16.3 | 19.3 | 19.8 | 23.0 | 21.7 | 22.2 | 22.3 | 23.6 |
|      |           |                           | 20.0               | 23.5 | 25.3 | 19.8 |      |      |      |      |      |      |
| 10.7 | 0.25      | 7.08                      | 7.97               | 7.42 | 7.01 | 6.35 | 7.05 | 8.04 | 6.94 | 7.15 | 7.02 | 6.97 |
|      |           |                           | 6.82               | 7.47 | 6.05 | 7.14 | 7.66 | 6.02 | 8.33 | 6.55 | 6.62 |      |
|      | 0.501     | 10.6                      | 9.09               | 9.80 | 12.7 | 10.3 | 9.15 | 11.3 | 11.0 | 12.4 | 10.9 | 10.1 |
|      |           |                           | 11.1               | 11.1 | 11.5 | 10.7 | 10.1 | 11.9 | 9.68 | 9.23 | 10.7 | 10.8 |
|      | 0.75      | 15.8                      | 8.80               |      |      |      |      |      |      |      |      |      |
|      |           |                           | 14.4               | 15.1 | 21.1 | 15.2 | 14.2 | 13.4 | 16.7 | 14.4 | 15.1 | 14.3 |
|      | 0.998     | 19.6                      | 15.1               | 20.6 | 14.3 | 15.1 | 13.4 | 14.1 | 14.5 | 16.6 | 18.8 | 15.5 |
|      |           |                           | 20.2               |      |      |      |      |      |      |      |      |      |
| 10.8 | 0.251     | 5.54                      | 19.1               | 22.9 | 22.6 | 22.7 | 17.1 | 19.2 | 20.8 | 16.2 | 19.5 | 18.2 |
|      |           |                           | 17.3               |      |      |      |      |      |      |      |      |      |
|      | 0.501     | 8.83                      | 5.77               | 4.71 | 5.84 | 5.93 | 5.43 | 5.27 | 5.61 | 4.72 | 5.83 | 5.68 |
|      |           |                           | 5.43               | 5.56 | 5.43 | 6.02 | 5.69 | 5.74 | 5.56 | 5.85 | 4.68 | 5.95 |
|      | 0.75      | 12.7                      | 9.24               | 7.03 | 11.1 | 10.3 | 10.1 | 9.01 | 6.91 | 7.54 | 9.65 | 11.5 |
|      |           |                           | 7.67               | 6.14 | 7.91 | 8.51 | 9.00 | 8.39 | 9.41 | 9.23 | 9.95 | 7.86 |
|      | 1.00      | 17.3                      | 10.6               | 8.47 | 9.05 | 6.99 | 8.86 | 9.23 |      |      |      |      |
|      |           |                           | 9.49               | 11.5 | 12.7 | 16.8 | 14.8 | 12.5 | 12.2 | 13.6 | 14.8 | 12.4 |
|      | 0.75      | 12.7                      | 13.4               | 12.2 | 9.76 | 12.7 | 15.7 | 10.8 | 11.6 | 11.2 |      |      |
|      |           |                           | 16.2               | 13.0 | 15.7 | 15.5 | 19.8 | 16.4 | 16.9 | 18.6 | 16.1 | 13.4 |
|      | 1.00      | 17.3                      | 19.3               | 16.8 | 20.4 | 18.8 | 20.9 | 19.2 | 17.6 |      |      |      |
|      |           |                           |                    |      |      |      |      |      |      |      |      |      |

Table S2 Rate constants (25 °C,  $I = 0.10 M$ ) for the reaction of 3-F-phenylboronic acid with propyleneglycol in alkaline solution.  $C_B = 2.4 \times 10^{-3} M$ , CAPS buffer (0.10 M) was used.

| pH   | $C_B / M$ | $k_{obs}$ (average) | $k_{obs} / s^{-1}$ |      |      |      |      |       |      |       |      |      |  |
|------|-----------|---------------------|--------------------|------|------|------|------|-------|------|-------|------|------|--|
| 10.3 | 0.250     | 5.10                | 5.08               | 4.93 | 5.18 | 4.87 | 5.14 | 5.36  | 5.00 | 5.08  | 5.27 | 4.83 |  |
|      |           |                     | 5.29               | 4.95 | 5.06 | 4.93 | 4.98 | 5.28  | 5.17 | 5.30  | 5.13 |      |  |
|      | 0.501     | 7.73                | 7.63               | 8.00 | 8.09 | 7.50 | 7.56 | 7.51  | 7.78 | 7.74  | 7.86 | 7.77 |  |
|      |           |                     | 7.64               | 7.94 | 7.42 | 7.63 | 7.75 | 7.78  |      |       |      |      |  |
|      | 0.750     | 10.5                | 9.56               | 10.1 | 11.6 | 11.8 | 9.87 | 12.00 | 9.86 | 10.60 | 9.81 | 9.34 |  |
|      |           |                     | 9.55               | 10.9 | 10.2 | 10.4 | 12.1 | 11.0  | 11.6 | 10.2  | 9.57 |      |  |
|      | 1.00      | 13.2                | 14.1               | 12.4 | 11.7 | 16.0 | 13.1 | 12.5  | 11.9 | 12.4  | 15.5 | 14.2 |  |
|      |           |                     | 13.0               | 11.6 | 12.6 | 15.7 | 12.9 | 12.1  | 12.8 | 13.0  |      |      |  |
| 10.4 | 0.250     | 4.51                | 4.49               | 4.77 | 4.83 | 4.44 | 4.47 | 4.36  | 4.67 | 4.48  | 4.50 | 4.34 |  |
|      |           |                     | 4.46               | 4.66 | 4.51 | 4.52 | 4.57 | 4.52  | 4.40 | 4.37  | 4.34 |      |  |
|      | 0.500     | 6.78                | 6.78               | 6.86 | 6.40 | 6.78 | 6.31 | 6.13  | 6.09 | 7.18  | 6.56 | 7.23 |  |
|      |           |                     | 6.86               | 6.71 | 6.75 | 6.94 | 6.98 | 7.10  | 6.75 | 7.16  | 6.85 | 6.36 |  |
|      | 0.750     | 8.79                | 9.10               | 8.82 | 8.19 | 8.69 | 8.84 | 8.40  | 9.04 | 9.02  | 8.79 | 8.77 |  |
|      |           |                     | 8.68               | 8.46 | 9.60 | 8.30 | 8.86 | 8.81  | 8.69 | 9.78  | 8.15 | 8.53 |  |
|      | 1.00      | 11.4                | 10.7               | 11.4 | 12.1 | 10.7 | 11.6 | 11.8  | 10.9 | 12.2  | 12.0 | 11.6 |  |
|      |           |                     | 11.7               | 11.3 | 10.2 | 11.0 | 11.4 | 10.7  | 12.7 | 12.3  |      |      |  |
| 10.5 | 0.250     | 4.06                | 4.19               | 4.07 | 3.84 | 3.98 | 3.53 | 4.30  | 3.66 | 3.96  | 3.97 | 4.22 |  |
|      |           |                     | 4.33               | 4.03 | 4.37 | 3.82 | 4.03 | 4.16  | 4.23 | 4.38  |      |      |  |
|      | 0.500     | 6.33                | 6.11               | 6.35 | 5.98 | 6.18 | 6.24 | 6.58  | 6.28 | 6.33  | 6.36 | 6.55 |  |
|      |           |                     | 6.07               | 6.44 | 6.56 | 6.28 | 6.53 | 6.27  | 6.44 | 6.34  |      |      |  |
|      | 0.750     | 8.64                | 8.48               | 8.97 | 8.26 | 8.54 | 8.64 | 8.48  | 7.87 | 8.44  | 8.59 | 9.10 |  |
|      |           |                     | 9.33               | 9.27 | 9.12 | 8.59 | 8.83 | 8.17  | 8.46 | 8.42  |      |      |  |
|      | 0.998     | 10.0                | 11.3               | 9.98 | 9.79 | 9.20 | 9.14 | 9.89  | 9.81 | 9.36  | 10.0 | 11.1 |  |
|      |           |                     | 9.95               | 9.54 | 10.2 | 10.6 | 9.28 | 9.23  | 11.1 | 9.36  | 11.7 |      |  |
| 10.6 | 0.250     | 3.24                | 3.07               | 3.38 | 3.08 | 3.25 | 3.42 | 3.10  | 3.30 | 3.16  | 3.23 | 3.13 |  |
|      |           |                     | 3.28               | 3.22 | 3.28 | 3.31 | 3.29 | 3.32  |      |       |      |      |  |
|      | 0.500     | 5.35                | 5.55               | 5.45 | 5.51 | 5.23 | 5.17 | 5.49  | 5.29 | 5.35  | 5.27 | 5.27 |  |
|      |           |                     | 5.32               | 5.29 |      |      |      |       |      |       |      |      |  |
|      | 0.750     | 6.83                | 6.75               | 7.49 | 6.83 | 7.05 | 6.77 | 7.38  | 7.30 | 6.43  | 6.79 | 6.49 |  |
|      |           |                     | 6.90               | 6.13 | 6.99 | 6.57 | 6.55 | 6.29  | 7.28 | 7.04  | 6.62 | 6.77 |  |
|      | 1.00      | 8.76                | 9.31               | 8.72 | 8.52 | 9.91 | 8.62 | 8.91  | 8.18 | 9.89  | 8.88 | 8.22 |  |
|      |           |                     | 7.58               | 7.97 | 7.92 | 8.58 | 8.71 | 9.68  | 9.24 | 8.56  | 9.11 |      |  |
| 10.7 | 0.25      | 2.86                | 2.97               | 2.77 | 2.97 | 2.86 | 2.85 | 2.69  | 2.98 | 2.88  | 2.85 | 2.93 |  |
|      |           |                     | 2.83               | 2.90 | 2.93 | 2.87 | 2.64 | 2.80  |      |       |      |      |  |
|      | 0.5       | 4.23                | 4.34               | 4.95 | 4.05 | 4.15 | 4.74 | 4.49  | 3.78 | 4.22  | 4.22 | 4.10 |  |
|      |           |                     | 4.40               | 4.24 | 4.12 | 4.20 | 4.10 | 4.19  | 3.85 | 4.07  | 4.15 |      |  |
|      | 0.75      | 6.14                | 6.42               | 6.02 | 5.94 | 6.21 | 5.94 | 6.08  | 6.30 | 6.35  | 6.17 | 6.16 |  |
|      |           |                     | 5.83               | 6.30 | 6.22 | 6.22 | 5.93 | 6.07  | 6.24 |       |      |      |  |
|      | 1.00      | 7.38                | 7.40               | 7.35 | 7.24 | 7.38 | 7.36 | 7.18  | 7.32 | 7.17  | 7.37 | 7.33 |  |
|      |           |                     | 7.48               | 7.60 | 7.55 | 7.40 | 7.60 |       |      |       |      |      |  |



Table S3 Rate constants (25 °C,  $I = 1.0$  M) for the reaction of 3-pyridylboronic acid with Tiron in acidic aqueous solution.  $C_L = 5.0 \times 10^{-5}$  M.

| pH    | $C_B / \text{mM}$ | $k_{\text{obs}}$ (average) | $k_{\text{obs}} / \text{s}^{-1}$ |       |       |       |       |       |       |       |       |       |       |
|-------|-------------------|----------------------------|----------------------------------|-------|-------|-------|-------|-------|-------|-------|-------|-------|-------|
| 2.40  | 1.00              | 26.9                       | 27.3,                            | 27.6  | 26.5  | 26.4  | 25.6  | 27.9  | 27.4  | 27.5  | 26.1  | 26.1  |       |
|       |                   |                            | 27.4,                            | 27.1  | 27.5  | 27.8  | 26.4  | 27.5  | 27.4  | 27.3  | 27.2  | 26.8  |       |
|       |                   |                            | 26.2,                            | 26.9  | 25.6  | 25.5  | 27.8  | 25.8  | 27.1  | 26.5  | 27.3  | 27.8  |       |
|       | 1.50              | 30.1                       | 30.5,                            | 30.7  | 29.3  | 30.4  | 29.9  | 30.2  | 30.4  | 31.4  | 30.6  | 29.3  |       |
|       |                   |                            | 30.2,                            | 29.5  | 29.1  | 29.4  | 29.1  | 29.7  | 30.4  | 29.2  | 29.7  | 31.1  |       |
|       |                   |                            | 29.8,                            | 30.2  | 29.1  | 31.3  | 29.7  | 30.1  | 31.1  | 31.4  | 29.9  | 29.5  |       |
|       | 2.00              | 33.0                       | 33.4,                            | 33.0  | 33.1  | 32.9  | 32.8  | 32.9  | 32.8  | 33.4  | 33.1  | 33.0  |       |
|       |                   |                            | 33.2,                            | 33.0  | 32.7, | 33.1, | 33.1, | 32.9, | 32.8, | 32.8, | 32.8, | 33.1, |       |
|       |                   |                            | 33.4,                            | 32.5  |       |       |       |       |       |       |       |       |       |
|       | 2.50              | 35.7                       | 38.0,                            | 35.7, | 35.9, | 35.8, | 35.6, | 35.3, | 34.7, | 35.6, | 35.2, | 35.4, |       |
|       |                   |                            | 36.0,                            | 35.6  |       |       |       |       |       |       |       |       |       |
|       |                   |                            |                                  |       |       |       |       |       |       |       |       |       |       |
| 2.60  | 1.00              | 22.0                       | 22.1,                            | 21.3, | 21.8, | 21.8, | 21.6, | 21.9, | 22.3, | 20.9, | 21.0, | 21.1, |       |
|       |                   |                            | 22.9,                            | 23.6, | 21.8, | 22.4, | 23.1, | 22.5, | 22.5, | 22.1, | 21.3, | 21.1, |       |
|       |                   |                            | 23.7,                            | 21.6  |       |       |       |       |       |       |       |       |       |
|       | 1.50              | 25.0                       | 26.0,                            | 25.1, | 25.7, | 24.7, | 24.8, | 25.4, | 24.7, | 24.8, | 24.9, | 24.6, |       |
|       |                   |                            | 25.0,                            | 24.5, | 25.5, | 25.1, | 25.1, | 25.8, | 25.3, | 24.5, | 24.4, | 24.3, |       |
|       |                   |                            | 25.0,                            | 25.0  |       |       |       |       |       |       |       |       |       |
|       | 2.00              | 28.3                       | 28.0,                            | 28.4, | 28.1, | 28.4, | 28.9, | 27.9, | 28.7, | 28.2, | 28.1, | 27.7, |       |
|       |                   |                            | 28.7,                            | 28.2, | 28.6, | 28.6, | 28.0, | 28.4, | 28.3  |       |       |       |       |
|       | 2.50              | 31.3                       | 32.5,                            | 31.5, | 31.4, | 31.4, | 31.1, | 30.6, | 30.9, | 31.2, | 32.6, | 30.5, |       |
|       |                   |                            | 31.8,                            | 31.1, | 30.4, | 31.1, | 30.6, | 30.6, | 31.3, | 32.1, | 32.1, | 31.5, |       |
|       |                   |                            | 31.0                             |       |       |       |       |       |       |       |       |       |       |
|       | 2.80              | 1.00                       | 18.9                             | 18.8, | 19.4, | 18.5, | 19.1, | 19.1, | 19.7, | 18.6, | 19.1, | 18.6, | 18.4, |
| 19.3, |                   |                            |                                  | 18.7, | 19.5, | 19.2, | 18.2, | 18.4, | 18.7, | 18.7  |       |       |       |
| 1.50  |                   | 22.7                       | 23.5,                            | 22.4, | 23.2, | 22.3, | 23.0, | 22.6, | 23.2, | 22.3, | 22.8, | 22.1, |       |
|       |                   |                            | 22.2,                            | 23.2, | 22.3, | 23.2, | 22.9, | 22.7, | 22.9, | 22.0  |       |       |       |
| 2.00  |                   | 27.4                       | 26.3,                            | 26.1, | 25.6, | 27.0, | 27.0, | 27.4, | 26.8, | 27.2, | 26.3, | 26.1, |       |
|       |                   |                            | 27.2,                            | 25.9, | 25.9, | 26.6, | 26.8, | 27.0, | 26.1, | 25.7, | 31.1, | 28.8, |       |
|       |                   |                            | 29.0,                            | 32.2, | 28.5, | 29.1, | 29.1  | 31.1, | 28.8  |       |       |       |       |
| 2.50  |                   | 30.6                       | 30.7,                            | 29.5, | 30.8, | 30.0, | 31.5, | 32.4, | 30.3, | 30.0, | 29.0, | 29.7, |       |
|       |                   |                            | 31.9,                            | 30.4, | 32.0, | 29.8, | 31.7, | 31.8, | 29.6, | 31.2, | 29.5  |       |       |
| 3.20  |                   | 1.00                       | 17.1                             | 17.1, | 16.7, | 17.3, | 16.8, | 17.5, | 17.0, | 17.6, | 16.8, | 17.2, | 16.8, |
|       |                   |                            |                                  | 16.9, | 17.5, | 17.1, | 16.9, | 17.7, | 16.9, | 16.9  |       |       |       |
|       |                   | 1.50                       | 22.4                             | 21.5, | 23.1, | 22.2, | 23.0, | 23.2, | 21.8, | 23.0, | 22.3, | 21.7, | 22.0, |
|       |                   |                            |                                  |       |       |       |       |       |       |       |       |       |       |

|      |      |      |       |       |       |       |       |       |       |       |       |       |
|------|------|------|-------|-------|-------|-------|-------|-------|-------|-------|-------|-------|
|      |      |      | 21.8, | 22.5, | 22.8, | 22.5, | 21.9, | 23.4, | 22.0, | 22.1, | 22.5, | 22.3  |
| 3.20 | 2.00 | 28.0 | 27.9, | 26.9, | 28.6, | 26.9, | 29.1, | 28.4, | 28.9, | 27.7, | 27.6, | 26.9, |
|      |      |      | 27.4, | 28.8, | 28.8, | 27.7, | 28.4, | 28.8, | 27.1, | 27.6  |       |       |
|      | 2.50 | 32.7 | 34.6, | 33.5, | 33.8, | 32.0, | 33.2, | 32.2, | 34.9, | 32.4, | 32.0, | 31.9, |
|      |      |      | 32.0, | 32.4, | 31.9, | 32.8, | 31.9, | 32.6, | 32.9  |       |       |       |
| 3.40 | 1.00 | 17.1 | 16.7, | 17.5, | 16.7, | 17.4, | 18.1, | 17.4, | 17.2, | 16.6, | 16.8, | 17.2, |
|      |      |      | 17.0  |       |       |       |       |       |       |       |       |       |
|      | 1.50 | 23.1 | 22.9, | 23.0, | 23.8, | 22.6, | 24.4, | 23.2, | 23.7, | 23.1, | 22.1, | 21.8, |
|      |      |      |       | 22.9, | 23.4, | 23.3, | 23.0  |       |       |       |       |       |
|      | 2.00 | 29.3 | 28.9, | 29.3, | 30.3, | 29.5, | 29.1, | 29.0, | 29.0, | 29.9, | 29.7, | 29.2, |
|      |      |      | 29.0, | 28.4  |       |       |       |       |       |       |       |       |
|      | 2.50 | 36.1 | 35.2, | 36.5, | 35.9, | 37.3, | 35.5, | 36.6, | 36.1, | 35.1, | 36.5, | 35.8, |
|      |      |      | 35.2, | 37.3, | 35.5, | 37.6, | 35.5, | 35.7, | 35.8  |       |       |       |
| 3.60 | 1.00 | 17.6 | 17.4, | 18.0, | 17.6, | 17.6, | 17.6, | 17.5, | 17.5, | 17.7, | 17.3, | 18.0, |
|      |      |      | 17.5, | 17.8, | 17.8  |       |       |       |       |       |       |       |
|      | 1.50 | 24.4 | 25.0, | 23.6, | 24.8, | 24.4, | 23.4, | 24.9, | 25.0, | 23.8, | 24.4, | 24.7, |
|      |      |      |       | 24.6, | 24.1  |       |       |       |       |       |       |       |
|      | 2.00 | 31.8 | 31.4, | 31.6, | 31.8, | 32.2, | 31.9, | 31.8, | 31.0, | 32.1, | 31.9, | 32.2, |
|      |      |      | 32.2, | 31.5, | 31.3, | 32.2  |       |       |       |       |       |       |
|      | 2.50 | 38.3 | 38.3, | 37.8, | 38.3, | 38.7, | 38.0, | 38.0, | 39.2, | 37.4, | 38.2, | 38.0, |
|      |      |      | 38.9, | 38.9, | 38.2  |       |       |       |       |       |       |       |
| 4.00 | 1.00 | 17.4 | 17.4, | 17.5, | 17.5, | 17.4, | 17.4, | 17.4, | 17.4, | 17.4, | 17.4, | 17.5  |
|      | 1.50 | 25.1 | 24.4, | 24.6, | 24.8, | 24.4, | 25.5, | 24.8, | 25.4, | 25.2, | 24.6, | 24.3, |
|      |      |      | 24.8, | 25.9, | 25.9, | 25.1, | 25.3, | 25.2, | 25.8  |       |       |       |
|      |      |      | 25.3, | 24.8, | 25.2, | 24.9  |       |       |       |       |       |       |
|      | 2.00 | 32.9 | 33.4, | 33.2, | 32.4, | 33.6, | 33.2, | 32.6, | 33.7, | 32.8, | 32.4, | 32.0, |
|      |      |      | 33.5, | 33.0, | 33.4, | 32.8, | 33.2, | 32.3, | 31.8  |       |       |       |
|      | 2.50 | 40.1 | 39.0, | 39.5, | 39.0, | 40.7, | 38.8, | 39.9, | 39.7, | 39.8, | 41.8, | 39.4, |
|      |      |      | 41.5, | 40.6, | 41.6, | 38.7, | 40.6, | 42.0, | 40.0, | 40.7, | 39.9, | 40.5, |
|      |      |      | 40.5, | 39.5, | 38.9, | 40.4  |       |       |       |       |       |       |
| 4.20 | 1.00 | 15.9 | 15.8, | 16.1, | 15.9, | 15.7, | 16.0, | 15.9, | 16.1, | 15.6, | 15.8, | 15.8, |
|      |      |      | 16.0, | 15.7, | 16.1, | 16.1, | 15.9, | 15.6, | 15.9, | 16.0  |       |       |
|      | 1.50 | 23.1 | 22.9, | 23.1, | 23.1, | 22.6, | 23.6, | 23.5, | 23.1, | 22.8, | 22.7, | 22.9, |
|      |      |      | 23.1, | 23.0, | 23.4, | 22.9, | 23.4  |       |       |       |       |       |
|      | 2.00 | 30.0 | 29.7, | 29.7, | 30.8, | 29.3, | 30.5, | 29.8, | 30.0, | 29.7, | 29.5, | 29.8, |
|      |      |      | 30.1, | 29.7, | 30.6, | 30.0, | 29.6, | 30.3, | 30.4, | 29.9  |       |       |

|      |      |      |             |            |       |       |       |       |       |       |       |       |
|------|------|------|-------------|------------|-------|-------|-------|-------|-------|-------|-------|-------|
|      | 2.50 | 37.6 | 36.9, 37.8, | 37.4, 38.1 | 38.3, | 38.4, | 38.0, | 37.7, | 37.1, | 38.1, | 36.3, | 36.8, |
| 4.40 | 1.00 | 14.5 | 14.5,       | 14.3,      | 14.4, | 14.5, | 14.5, | 14.5, | 14.3, | 14.6, | 14.6, | 14.5  |
|      | 1.50 | 20.8 | 20.4,       | 21.0,      | 20.8, | 20.9, | 20.4, | 21.1, | 21.0, | 21.0, | 20.5, | 20.5, |
| 4.40 | 2.00 | 27.5 | 27.6,       | 27.5,      | 27.2, | 27.8, | 27.3, | 27.4, | 27.3, | 27.9, | 27.5, | 27.5, |
|      | 2.50 | 34.0 | 33.6,       | 33.0,      | 35.5, | 33.0, | 33.7, | 34.3, | 35.3, | 34.2, | 33.9, | 33.9, |
| 4.50 | 1.00 | 13.0 | 13.0,       | 12.9,      | 12.9, | 13.0, | 13.2, | 13.0, | 13.0, | 13.0, | 13.3, | 13.1, |
|      | 1.50 | 19.5 | 19.7,       | 19.2,      | 19.8, | 19.5, | 19.4, | 19.6, | 19.5, | 19.4, | 19.4, | 19.5, |
|      | 2.00 | 25.9 | 25.7,       | 25.6,      | 25.2, | 25.8, | 25.7, | 26.5, | 25.8, | 25.8, | 25.8, | 25.8, |
|      | 2.50 | 31.8 | 31.7,       | 31.8,      | 31.0, | 32.1, | 31.4, | 32.3, | 32.4, | 31.0, | 31.1, | 31.1, |
| 4.60 | 1.00 | 11.8 | 31.4,       | 32.6,      | 31.9, | 32.8, | 32.8, | 31.7, | 31.6, | 32.0, | 32.0, | 31.8  |
|      | 1.50 | 17.0 | 11.7,       | 11.9,      | 11.8, | 11.8, | 11.6, | 11.7, | 11.7, | 11.8, | 12.0, | 11.8, |
|      | 2.00 | 23.6 | 11.8,       | 11.8,      | 12.0, | 12.0, | 11.9, | 11.9, | 11.9, | 11.9, | 12.1, | 11.9  |
|      | 2.50 | 29.3 | 16.9,       | 17.2,      | 17.2, | 16.8, | 16.9, | 17.2, | 16.9, | 17.1, | 17.3, | 16.7, |
| 4.70 | 1.00 | 10.6 | 16.9,       | 17.2,      | 16.9, | 17.2, | 16.6, | 17.4, | 17.1, | 17.1, | 17.0, | 17.0  |
|      | 1.50 | 15.6 | 23.8,       | 23.4,      | 23.5, | 23.1, | 23.4, | 24.3, | 23.7, | 23.4, | 23.0, | 22.9, |
|      | 2.00 | 21.2 | 24.1,       | 24.0,      | 23.5, | 23.5, | 23.8, | 23.3, | 23.9, | 24.1, | 23.3, | 23.3, |
|      | 2.50 | 26.6 | 23.6        | 29.2,      | 29.2, | 29.5, | 29.4, | 28.4, | 29.2, | 30.1, | 29.2, | 28.9, |
| 4.80 | 1.00 | 9.78 | 29.1,       | 29.8,      | 29.2, | 30.0, | 29.3, | 28.8, | 29.8, | 29.8, | 29.4, | 28.7, |
|      | 1.50 | 14.3 | 29.0        | 10.6,      | 10.8, | 10.5, | 10.6  |       |       |       |       |       |
|      | 2.00 | 21.2 | 10.6,       | 15.6,      | 15.5, | 15.3, | 15.5, | 15.4, | 15.7, | 15.6, | 15.9, | 15.5, |
|      | 2.50 | 26.6 | 15.5,       | 15.6,      | 15.3, | 15.5, | 15.4, | 15.7, | 15.6, | 15.9, | 15.5, | 15.5, |
|      | 1.00 | 9.78 | 16.0,       | 15.4       |       |       |       |       |       |       |       |       |
|      | 1.50 | 14.3 | 20.8,       | 21.3,      | 21.6, | 21.0, | 21.2  |       |       |       |       |       |
|      | 2.00 | 21.2 | 26.1,       | 27.0,      | 26.8, | 26.8, | 25.9, | 26.7, | 26.6, | 26.7, | 26.8, | 26.8, |
|      | 2.50 | 26.6 | 27.0,       | 26.3,      | 26.9, | 26.9, | 26.9, | 26.3, | 26.2, | 26.1  |       |       |
|      | 1.00 | 9.78 | 9.84,       | 9.73,      | 9.77, | 9.83, | 9.65, | 9.71, | 9.91, | 9.78  |       |       |
|      | 1.50 | 14.3 | 14.2,       | 14.2,      | 14.4, | 14.4, | 14.2, | 14.5, | 14.1, | 14.3, | 14.2, | 14.4, |
|      |      |      | 14.2,       | 14.4,      | 14.4  |       |       |       |       |       |       |       |

|      |      |      |             |             |             |             |             |             |             |             |             |             |
|------|------|------|-------------|-------------|-------------|-------------|-------------|-------------|-------------|-------------|-------------|-------------|
| 4.90 | 2.00 | 19.1 | 19.2, 18.9, | 19.1, 19.1, | 19.1, 19.2, | 19.2, 19.0, | 19.1, 19.4, | 19.2, 19.1, | 19.1, 19.1, |             |             |             |
|      | 2.50 | 23.9 | 23.8, 23.7, | 24.2, 23.9, | 24.2, 23.8  | 23.9, 23.9, | 24.0, 24.2, | 23.7, 23.8, | 23.8,       |             |             |             |
|      | 1.00 | 8.78 | 8.94, 8.71, | 8.76, 8.74  | 8.76, 8.72, | 8.83, 8.83, | 8.75, 8.72, | 8.83, 8.75, | 8.82,       |             |             |             |
|      | 1.50 | 13.3 | 13.3, 13.3, | 13.4, 13.3  | 13.2, 13.2, | 13.2, 13.2, | 13.4, 13.3, | 13.4, 13.1, | 13.2,       |             |             |             |
|      | 2.00 | 17.1 | 17.2, 17.1, | 17.2, 17.0, | 17.0, 17.2, | 16.9, 17.0  | 17.1, 17.1, | 17.0, 17.2, | 17.1, 17.1, |             |             |             |
| 5.00 | 2.50 | 21.4 | 21.5, 21.1, | 21.1, 21.4, | 21.8, 21.0, | 21.7, 21.1, | 21.1, 21.7, | 20.9, 21.4, | 21.8, 21.6, | 21.5, 21.4, |             |             |
|      | 1.00 | 7.98 | 7.87, 8.12, | 8.09, 8.06, | 8.00, 8.05, | 7.96, 8.00, | 8.01, 7.89, | 8.08, 7.96, | 8.04, 7.94, | 7.84, 7.93, | 7.96, 8.00  |             |
|      | 1.50 | 11.6 | 11.5, 11.6, | 11.4, 11.7, | 11.6, 11.8, | 11.4, 11.7, | 11.7, 11.5, | 11.5, 11.6, | 11.8, 11.6, | 11.5, 11.5, | 11.5, 11.6  |             |
|      | 2.00 | 15.8 | 15.6, 15.8, | 15.8, 15.7, | 15.6, 15.7, | 16.0, 16.0, | 15.6, 15.9, | 15.8, 15.5, | 15.8, 15.9, | 15.4, 15.9, | 15.7, 16.1, | 15.7, 15.7  |
|      | 2.50 | 19.3 | 19.6, 19.3, | 19.2, 19.4, | 19.6, 19.2, | 19.2, 19.5, | 19.5, 19.5, | 19.1, 19.2, | 19.4, 19.3, | 18.7, 19.0, | 19.2, 19.1, | 19.3, 19.7, |
| 5.10 | 1.00 | 7.03 | 6.93, 7.02, | 7.04, 7.03, | 7.08, 7.03, | 7.11, 7.02, | 7.02, 7.02, | 7.02, 6.98  | 7.00, 7.06, | 6.99, 7.06, | 7.06, 7.09, |             |
|      | 1.50 | 10.3 | 10.1, 10.5, | 10.4, 10.4, | 10.5, 10.4, | 10.3, 10.3, | 10.4, 10.3, | 10.3, 10.2, | 10.2, 10.3, | 10.1, 10.2, | 10.1, 10.2, | 10.1, 10.2  |
|      | 2.00 | 13.5 | 13.6, 13.5, | 13.8, 13.6, | 13.6, 13.6, | 13.5, 13.7, | 13.6, 13.4, | 13.5, 13.7, | 13.4, 13.5, | 13.3, 13.3, | 13.3, 13.4, |             |
|      | 2.50 | 17.1 | 17.0, 17.1, | 17.7, 16.8, | 17.3, 17.3, | 17.3, 17.2, | 17.1, 17.4, | 17.0, 17.4, | 17.3, 17.3, | 16.7, 17.0, | 16.8, 16.9, | 17.0, 17.4, |
|      | 1.00 | 5.44 | 5.31, 5.48, | 5.44, 5.52  | 5.38, 5.46, | 5.46, 5.46, | 5.40, 5.46, | 5.40, 5.46, | 5.46, 5.47, | 5.47, 5.45, | 5.45, 5.46, |             |
| 5.30 | 1.50 | 8.05 | 8.05, 8.12, | 8.06, 8.09  | 7.99, 8.13, | 8.13, 8.19, | 8.19, 8.05, | 8.05, 7.96, | 8.03, 8.03, | 7.96, 7.96, | 8.01,       |             |
|      | 2.00 | 10.4 | 10.5, 10.5, | 10.3, 10.4  | 10.4, 10.4, | 10.4, 10.5, | 10.5, 10.5, | 10.5, 10.5, | 10.3, 10.3, | 10.2, 10.2, | 10.3,       |             |

|      |      |      |       |       |       |       |       |       |       |       |       |       |
|------|------|------|-------|-------|-------|-------|-------|-------|-------|-------|-------|-------|
|      | 2.50 | 13.4 | 13.4, | 13.6, | 13.3, | 13.5, | 13.4, | 13.2, | 13.7, | 13.4, | 13.3, | 13.3, |
|      |      |      | 13.5, | 13.4  |       |       |       |       |       |       |       |       |
| 5.60 | 1.00 | 4.14 | 4.05, | 4.13, | 4.10, | 4.13, | 4.12, | 4.13, | 4.14, | 4.14, | 4.16, | 4.18, |
|      |      |      | 4.18, | 4.17, | 4.18, | 4.18  |       |       |       |       |       |       |
|      | 1.50 | 6.24 | 6.20, | 6.20, | 6.24, | 6.22, | 6.28, | 6.25, | 6.27, | 6.23, | 6.22, | 6.19, |
|      |      |      | 6.27  |       |       |       |       |       |       |       |       |       |
|      | 2.00 | 8.29 | 8.20, | 8.31, | 8.40, | 8.16, | 8.32, | 8.31, | 8.27, | 8.17, | 8.34, | 8.30, |
|      |      |      | 8.38, | 8.38  |       |       |       |       |       |       |       |       |
|      | 2.50 | 10.3 | 10.2, | 10.2, | 10.3, | 10.3, | 10.3, | 10.4, | 10.4, | 10.4, | 10.4, | 10.4, |
|      |      |      | 10.3, | 10.3  |       |       |       |       |       |       |       |       |

Table S4 Rate constants (15 °C,  $I = 1.0$  M) for the reaction of 3-pyridylboronic acid with 2,2'-biphenol in acidic aqueous solution ( $C_B \gg C_L$ ).  $C_L = 6.0 \times 10^{-5}$  M.

| pH   | $C_B / \text{mM}$ | $k_{\text{obs}}$ (average) | $k_{\text{obs}} / \text{s}^{-1}$                  |                                        |                                                    |                                                   |                                                   |                                                   |                                                   |                                                   |                                        |  |  |
|------|-------------------|----------------------------|---------------------------------------------------|----------------------------------------|----------------------------------------------------|---------------------------------------------------|---------------------------------------------------|---------------------------------------------------|---------------------------------------------------|---------------------------------------------------|----------------------------------------|--|--|
| 4.00 | 1.20              | 147                        | 134, 136, 151, 146, 149, 146, 136, 154, 155, 147, | 150, 146, 147, 143, 146, 152, 142, 161 |                                                    |                                                   |                                                   |                                                   |                                                   |                                                   |                                        |  |  |
|      |                   |                            | 1.80                                              | 170                                    | 172, 153, 166, 163, 167, 173, 176, 179, 164, 173,  | 170, 181, 166, 168, 187, 180, 174, 181, 166, 155, | 152                                               |                                                   |                                                   |                                                   |                                        |  |  |
|      | 2.40              | 193                        |                                                   |                                        | 192, 194, 187, 192, 199, 205, 198, 193, 184, 188,  | 195, 190                                          |                                                   |                                                   |                                                   |                                                   |                                        |  |  |
|      |                   |                            | 3.00                                              | 210                                    | 211, 217, 201, 206, 228, 215, 195, 219, 196, 208,  | 204, 218                                          |                                                   |                                                   |                                                   |                                                   |                                        |  |  |
| 4.20 | 1.20              | 123                        |                                                   |                                        | 117, 130, 115, 127, 131, 134, 125, 124, 112, 120,  | 118                                               |                                                   |                                                   |                                                   |                                                   |                                        |  |  |
|      |                   |                            | 1.80                                              | 146                                    | 154, 131, 137, 150, 154, 143, 144, 154, 150, 148,  | 143, 135, 141, 152, 145, 146, 152, 132, 153, 146, | 141, 134, 150, 141, 141, 146, 163, 152, 150, 131, | 147, 150, 143, 139, 150, 156, 144, 143, 160, 150, | 149, 150, 139, 145, 142, 137, 147, 149, 135, 144, | 141, 135, 131, 136, 123, 158, 127, 146, 147, 168, | 161, 147, 137, 169, 139, 154, 152, 168 |  |  |
|      | 2.40              | 166                        |                                                   |                                        | 161, 165, 173, 169, 170, 165, 165, 164, 172, 186,  | 154, 165, 165, 167, 160, 166, 173, 175, 169, 162, | 160, 165, 161, 155, 171, 150, 147, 159, 157, 167, | 170, 154, 172, 189, 183, 165, 155, 158, 172, 163, | 165, 172, 170, 178, 171, 168, 161, 153, 179       |                                                   |                                        |  |  |
|      |                   |                            | 3.00                                              | 183                                    | 171, 182, 190, 192, 183, 178, 174, 188, 178, 191,  | 175, 201, 181, 187, 176, 197, 188, 174, 183, 176, | 180, 185, 184, 185, 188, 171, 185                 |                                                   |                                                   |                                                   |                                        |  |  |
| 4.40 | 1.20              | 107                        |                                                   |                                        | 89.5, 101, 107, 104, 106, 102, 106, 112, 111, 110, | 116, 118, 116, 103, 102                           |                                                   |                                                   |                                                   |                                                   |                                        |  |  |
|      |                   |                            | 1.80                                              | 126                                    | 123, 133, 131, 134, 127, 130, 119, 124, 124, 120,  | 127, 126, 125, 131, 121                           |                                                   |                                                   |                                                   |                                                   |                                        |  |  |
|      | 2.40              | 145                        |                                                   |                                        | 144, 146, 147, 141, 139, 140, 144, 139, 142, 153,  | 150, 142, 144, 148, 143, 143, 143, 141, 136, 151, | 147, 140, 144, 147, 157, 157, 146, 146, 147, 167, | 155, 148, 148, 128, 148, 147, 144, 146, 143, 132, | 145, 142, 135, 135, 138, 150, 141, 139            |                                                   |                                        |  |  |

|      |      |     |                                                            |                                                      |                                                            |                                                            |                                                  |                                             |                                             |                                             |                                   |                                   |
|------|------|-----|------------------------------------------------------------|------------------------------------------------------|------------------------------------------------------------|------------------------------------------------------------|--------------------------------------------------|---------------------------------------------|---------------------------------------------|---------------------------------------------|-----------------------------------|-----------------------------------|
|      | 3.00 | 167 | 169, 160, 168, 163, 168, 169                               | 151, 171, 163, 168, 169                              | 144, 181, 163, 169                                         | 179, 163, 167, 166, 166, 167, 166, 167, 167, 187, 159,     | 176, 162, 166, 159, 166, 171,                    | 162, 166, 159, 166, 171,                    | 166, 159, 166, 167, 187, 159,               | 159, 166, 171,                              | 166, 171,                         | 171, 159,                         |
| 4.60 | 1.20 | 93  | 104, 89.8, 88.9, 88.9, 88.9, 94.0                          | 92.6, 94.0, 97.1, 94.0                               | 86.1, 89.7, 96.8, 95.7, 94.8, 93.9, 97.3, 91.3, 98.1, 101, | 97.6, 96.8, 99.7, 95.7, 94.8, 93.9, 97.3, 91.3, 98.1, 101, | 94.4, 99.7, 94.8, 93.9, 97.3, 91.3, 98.1, 101,   | 93.4, 90.7, 93.9, 97.3, 91.3, 98.1, 101,    | 91.9, 95.9, 97.3, 91.3, 98.1, 101,          | 91.7, 91.8, 91.3, 98.1, 101,                | 88.3, 87.2, 98.1, 101,            | 85.1, 92.3,                       |
|      | 1.80 | 114 | 120, 126, 135, 131, 148, 148, 155, 148, 152                | 112, 127, 133, 127, 148, 148, 152                    | 116, 129, 139, 133, 127, 135, 127, 134, 131                | 112, 129, 139, 133, 127, 135, 127, 134, 131                | 112, 129, 139, 133, 127, 135, 127, 134, 131      | 110, 129, 140, 137, 137, 134, 131           | 113, 127, 138, 133, 137, 132, 130,          | 115, 129, 133, 137, 132, 130,               |                                   |                                   |
|      | 2.40 | 131 | 125, 126, 135, 131, 143, 148, 148, 148, 155, 148, 152      | 131, 127, 133, 127, 148, 148, 152                    | 130, 129, 139, 133, 127, 135, 127, 134, 131                | 126, 129, 139, 133, 127, 135, 127, 134, 131                | 129, 129, 140, 137, 137, 134, 131                | 129, 127, 138, 133, 137, 132, 130,          | 129, 127, 138, 133, 137, 132, 130,          | 125, 129, 129, 125, 129,                    | 129, 129, 129, 125, 129,          | 129, 129,                         |
|      | 3.00 | 150 | 149, 144, 151, 143, 148, 148, 148, 155, 148, 152           | 158, 147, 150, 148, 148, 148, 152                    | 146, 151, 153, 144, 146, 149, 143, 148, 148, 148, 152      | 145, 151, 155, 146, 149, 143, 148, 148, 148, 152           | 152, 152, 154, 146, 149, 143, 148, 148, 148, 152 | 153, 145, 154, 143, 143, 148, 148, 148, 152 | 145, 148, 144, 146, 143, 148, 148, 148, 152 | 143, 148, 146, 153, 145, 148, 148, 148, 152 | 149, 165, 153, 148, 148, 148, 152 | 154, 169, 145, 148, 148, 148, 152 |
| 4.80 | 1.20 | 87  | 87.2, 91.7, 78.6, 87.5, 87.4, 92.8, 90.0, 86.0, 87.5, 80.5 | 88.3, 90.2, 80.3, 87.4, 92.8, 90.0, 86.0, 87.5, 80.5 | 85.6, 87.0, 82.9, 92.8, 90.0, 86.0, 87.5, 80.5             | 87.3, 90.6, 84.5, 90.0, 86.0, 87.5, 80.5                   | 90.0, 85.2, 86.7, 86.0, 87.5, 80.5               | 87.9, 85.5, 88.7, 87.5, 80.5                | 92.7, 90.3, 90.1, 80.5                      | 90.8, 92.0, 84.0, 80.5                      | 89.3, 78.3, 80.4, 86.5,           | 86.5, 83.1,                       |
|      | 1.80 | 102 | 109, 97.2, 108, 107, 104, 99.1                             | 100, 100, 107, 104, 99.1                             | 100, 102, 104, 99.1                                        | 105, 107, 101, 99.3, 95.2, 93.5, 98.2, 106,                | 104, 107, 101, 99.3, 95.2, 93.5, 98.2, 106,      | 107, 101, 99.3, 95.2, 93.5, 98.2, 106,      | 104, 105, 93.5, 98.2, 106,                  | 105, 104, 93.5, 98.2, 106,                  | 104, 104, 98.2, 106,              | 100, 106,                         |
|      | 2.40 | 122 | 127, 125, 123                                              | 116, 123                                             | 122, 117, 120, 122, 123, 120, 125, 124,                    | 117, 120, 122, 123, 120, 125, 124,                         | 120, 122, 123, 120, 125, 124,                    | 122, 123, 120, 125, 124,                    | 123, 120, 125, 124,                         | 120, 125, 124,                              | 125, 124,                         | 124,                              |
|      | 3.00 | 141 | 147, 146, 148, 146, 129, 132, 136, 141                     | 146, 148, 146, 129, 132, 136, 141                    | 148, 146, 129, 132, 136, 141                               | 146, 146, 129, 132, 136, 141                               | 129, 132, 136, 141                               | 132, 136, 141                               | 136, 141                                    | 141                                         |                                   |                                   |
